# Supplementary material
Source: PubMed Central journal article supplement (PMC2664387)
Supplement: NIHMS85342-supplement-supplement_1.pdf [file NIHMS85342-supplement-supplement_1.pdf]

**Table S1:** Scientific and common names of birds, for which whole mitochondrial genome sequences are available in GenBank, used to evaluate the newly developed sequence for phylogentic analyses of the turkey

| <b>Bird</b>                         | <b>Accession</b> | <b>Common name</b>         |
|-------------------------------------|------------------|----------------------------|
| <i>Alectura lathamii</i>            | NC_007227        | Australian brush-turkey    |
| <i>Alligator mississippiensis</i> * | NC_001922        | American alligator         |
| <i>Anser albifrons</i>              | NC_004539        | White-fronted goose        |
| <i>Anseranas semipalmata</i>        | NC_005933        | Magpie goose               |
| <i>Apteryx haastii</i>              | NC_002782        | Great spotted kiwi         |
| <i>Apus apus</i>                    | NC_008540        | Swift                      |
| <i>Ardea novaehollandiae</i>        | NC_008551        | White-faced heron          |
| <i>Arenaria interpres</i>           | NC_003712        | Ruddy turnstone            |
| <i>Aythya americana</i>             | NC_000877        | Redhead                    |
| <i>Branta canadensis</i>            | NC_007011        | Canada goose               |
| <i>Buteo buteo</i>                  | NC_003128        | Common buzzard             |
| <i>Casuarus casuarus</i>            | NC_002778        | Southern cassowary         |
| <i>Cathartes aura</i>               | NC_007628        | Turkey vulture             |
| <i>Ciconia boyciana</i>             | NC_002196        | Oriental stork             |
| <i>Ciconia ciconia</i>              | NC_002197        | White stork                |
| <i>Cnemotriccus fuscatus</i>        | NC_007975        | Fuscous flycatcher         |
| <i>Corvus frugilegus</i>            | NC_002069        | Rook                       |
| <i>Coturnix chinensis</i>           | NC_004575        | Blue-breasted quail        |
| <i>Coturnix japonica</i>            | NC_003408        | Japanese quail             |
| <i>Cygnus columbianus</i>           | NC_007691        | Tundra swan                |
| <i>Diomedea melanophris</i>         | NC_007172        | Black-browed albatross     |
| <i>Dromaius novaehollandiae</i>     | NC_002784        | Emu                        |
| <i>Dryocopus pileatus</i>           | NC_008546        | Pileated woodpecker        |
| <i>Eudromia elegans</i>             | NC_002772        | Elegant crested-tinamou    |
| <i>Eudyptes chrysocome</i>          | NC_008138        | Rockhopper penguin         |
| <i>Eudyptula minor</i>              | NC_004538        | Little blue penguin        |
| <i>Falco peregrinus</i>             | NC_000878        | Peregrine falcon           |
| <i>Falco sparverius</i>             | NC_008547        | American kestrel           |
| <i>Gallus gallus gallus</i>         | NC_007236        | Chicken                    |
| <i>Gallus lafayettei</i>            | NC_007239        | Ceylon junglefowl          |
| <i>Gallus sonneratii</i>            | NC_007240        | Gray junglefowl            |
| <i>Gallus varius</i>                | NC_007238        | Green junglefowl           |
| <i>Gavia pacifica</i>               | NC_008139        | Pacific loon               |
| <i>Gavia stellata</i>               | NC_007007        | Red-throated loon          |
| <i>Haematopus ater</i>              | NC_003713        | Blackish oystercatcher     |
| <i>Homo sapiens</i> *               | NC_001807        | Human                      |
| <i>Larus dominicanus</i>            | NC_007006        | Southern black-backed gull |
| <i>Menura novaehollandiae</i>       | NC_007883        | Superb lyrebird            |
| <i>Meleagris gallopavo</i>          | EF153719         | Domestic turkey            |
| <i>Micrastur gilvicollis</i>        | NC_008548        | Lined forest-falcon        |
| <i>Ninox novaeseelandiae</i>        | NC_005932        | Morepork                   |
| <i>Nipponia nippon</i>              | NC_008132        | Crested ibis               |
| <i>Numida meleagris</i>             | NC_006382        | Helmeted guineafowl        |

|                                        |           |                       |
|----------------------------------------|-----------|-----------------------|
| <i>Pandion haliaetus</i>               | NC_008550 | Osprey                |
| <i>Phaethon rubricauda</i>             | NC_007979 | Red-tailed tropicbird |
| <i>Podiceps cristatus</i>              | NC_008140 | Great crested grebe   |
| <i>Pterocnemia pennata</i>             | NC_002783 | Lesser rhea           |
| <i>Pterodroma brevirostris</i>         | NC_007174 | Kerguelen petrel      |
| <i>Pteroglossus azara flavirostris</i> | NC_008549 | Ivory billed aracari  |
| <i>Rhea americana</i>                  | NC_000846 | Greater rhea          |
| <i>Smithornis sharpei</i>              | NC_000879 | Grey-headed broadbill |
| <i>Spizaetus alboniger</i>             | NC_007599 | Blyth's hawk-eagle    |
| <i>Spizaetus nipalensis</i>            | NC_007598 | Mountain hawk-eagle   |
| <i>Strigops habroptilus</i>            | NC_005931 | Kakapo                |
| <i>Struthio camelus</i>                | NC_002785 | Ostrich               |
| <i>Synthliboramphus antiquus</i>       | NC_007978 | Ancient murrelet      |
| <i>Taeniopygia guttata</i>             | NC_007897 | Zebra finch           |
| <i>Tinamus major</i>                   | NC_002781 | Great tinamou         |
| <i>Vidua chalybeata</i>                | NC_000880 | Steelblue widowfinch  |

---

\*Species used as outgroup in 16S rRNA-based phylogenetic analysis.
